# Supplementary material for: Chemosensory gene signatures of ecological niche and behavioural specialisation in Sirex noctilio
Source: Research Square preprint supplement (doi:10.21203/rs.3.rs-3144413/v1), 2023-08-17
Supplement: Supplementary file 1 [file 4d6db6d1c08b883e7ec0e094.xlsx]

## Sheet: ChemosensationGenes
Gene Family	SnocID	Apollo gene ID	Apollo transcript ID	CDS (bp)	Exons	Length (AA)	Transmembrane domains (TMHMM)	IPR	Pfam	SignalP	Top BLASTP hit	Top BLASTP hit Accession Number	Identity (%)	Evalue
OR	SnocOrco	augustus_masked-scaffold5-processed-gene-1.124-mRNA-1	be764f21-f3b3-4f80-aaa7-5abfd7ec7241	1446	9	481	7	IPR004117, Olfactory receptor, insect	PF02949, 7tm Odorant receptor		Orco	XP_012273699.1	3.79e-300	87.8
	SnocOr1	augustus_masked-scaffold690-processed-gene-0.66-mRNA-1-00002	9a0bd881-0b02-4e79-a86e-a53c1dc53fb3	1146	6	381	3	IPR004117, Olfactory receptor, insect	PF02949, 7tm Odorant receptor		odorant receptor 24a isoform X2 [Cephus cinctus]	XP_015608437.1	2.06e-84	38.9
	SnocOr2	augustus_masked-scaffold690-processed-gene-0.66-mRNA-1-00003	2ff60f5e-bfd1-40ab-afe0-b91a3074f24d	1128	6	375	3	IPR004117, Olfactory receptor, insect	PF02949, 7tm Odorant receptor		odorant receptor 24a isoform X2 [Cephus cinctus]	XP_015608437.1	7.88e-118	45.6
	SnocOr3	augustus_masked-scaffold690-processed-gene-0.66-mRNA-1-00006	06fe52d8-b386-4362-93a9-3f66f7a5987b	963	6	320	4	IPR004117, Olfactory receptor, insect	PF02949, 7tm Odorant receptor		odorant receptor 24a isoform X2 [Cephus cinctus]	XP_015608437.1	2.94e-86	42.9
	SnocOr4	augustus_masked-scaffold690-processed-gene-0.67-mRNA-1-00001	8f1bdfeb-7690-4555-872f-d50b2b5bc84d	1191	7	396	4	IPR004117, Olfactory receptor, insect	PF02949, 7tm Odorant receptor		odorant receptor 24a isoform X2 [Cephus cinctus]	XP_015607533.1	6.50e-104	39.7
	SnocOr5	augustus_masked-scaffold690-processed-gene-0.68-mRNA-1-00002	63be4633-97a3-4805-b290-ab55f09b05d2	1305	7	434	4	IPR004117, Olfactory receptor, insect	PF02949, 7tm Odorant receptor		odorant receptor 24a isoform X2 [Cephus cinctus]	XP_015608437.1	2.34e-103	39.3
	SnocOr6	augustus_masked-scaffold690-processed-gene-0.68-mRNA-1-00003	91a8aae9-1b3f-4384-9d78-fba48e382d36	1167	7	388	4	IPR004117, Olfactory receptor, insect	PF02949, 7tm Odorant receptor		odorant receptor 24a isoform X2 [Cephus cinctus]	XP_015608437.1	5.77e-116	43.2
	SnocOr7	augustus_masked-scaffold690-processed-gene-0.68-mRNA-1-00009	907e1af1-df90-4d74-a950-e03023386280	606	3	202	3	IPR004117, Olfactory receptor, insect	PF02949, 7tm Odorant receptor		odorant receptor 4 [Cephus cinctus]	XP_015608437.1	3.83e-34	36.8
	SnocOr8	scaffold690ea-00003	5b416f23-3eee-457a-95c8-e47b01708f77	1164	7	387	4	IPR004117, Olfactory receptor, insect	PF02949, 7tm Odorant receptor		odorant receptor 24a isoform X2 [Cephus cinctus]	XP_015608437.1	1.24e-109	42.1
	SnocOr9	augustus_masked-scaffold1137-processed-gene-0.3-mRNA-1-0002	e3d6a92a-47e5-4cc4-9a90-0799514274ed	1098	6	365	5	IPR004117, Olfactory receptor, insect	PF02949, 7tm Odorant receptor		odorant receptor 13a-like [Acromyrmex echinatior]	XP_011062734.1	2.81e-96	46.0
	SnocOr10	augustus_masked-scaffold128-processed-gene-5.93-mRNA-1-0002	8959c92b-b2e0-4be1-9630-5379276003b1	1200	6	399	6	IPR004117, Olfactory receptor, insect	PF02949, 7tm Odorant receptor		odorant receptor 13a-like isoform X1 [Athalia rosae]	XP_012256242.2	1.20e-85	38.1
	SnocOr11	augustus_masked-scaffold130-processed-gene-2.26-mRNA-1-00001	a4e52896-8153-4d8a-8617-de46cc7a6fd2	1404	7	467	6	IPR004117, Olfactory receptor, insect	PF02949, 7tm Odorant receptor		odorant receptor coreceptor isoform X2 [Cephus cinctus]	XP_015591755.1	3.34e-73	35.9
	SnocOr12	augustus_masked-scaffold161-processed-gene-3.69-mRNA-1-00002	b9dbea00-2a3c-4d65-9562-9f56e11d8d46	1050	7	349	5	IPR004117, Olfactory receptor, insect	PF02949, 7tm Odorant receptor		odorant receptor 13a-like [Athalia rosae]	XP_012264863.1	3.22e-48	32.9
	SnocOr13	augustus_masked-scaffold2020-processed-gene-0.14-mRNA-1-00002	1960a0b7-55e4-4718-b1b6-3fd1b1c5416d	794	5	264	4	IPR004117, Olfactory receptor, insect	PF02949, 7tm Odorant receptor		odorant receptor 13a-like [Solenopsis invicta]	XP_011176050.1	1.16e-59	39.2
	SnocOr14	augustus_masked-scaffold2067-processed-gene-0.0-mRNA-1-00002	e5ab1ce8-f94c-4c39-92cb-3998fa2741dc	1239	7	412	6	IPR004117, Olfactory receptor, insect	PF02949, 7tm Odorant receptor		odorant receptor 13a-like [Acromyrmex echinatior]	XP_011062734.1	6.38e-105	43.6
	SnocOr15	augustus_masked-scaffold274-processed-gene-2.99-mRNA-1	f19e607f-c19d-4ca9-9d89-a3b296ea5d5f	1224	5	407	5	IPR004117, Olfactory receptor, insect	PF02949, 7tm Odorant receptor		odorant receptor 47a-like [Dufourea novaeangliae]	XP_015438926.1	9.45e-117	44.7
	SnocOr16	augustus_masked-scaffold303-processed-gene-0.136-mRNA-1-00002	518a4410-7ff1-4947-9d18-e4af8ad1ccf9	1167	8	388	3	IPR004117, Olfactory receptor, insect	PF02949, 7tm Odorant receptor		odorant receptor [Campoletis chlorideae]	AXM05163.1	8.04e-83	37.7
	SnocOr17	augustus_masked-scaffold330-processed-gene-3.3-mRNA-1-00001	48a4ada2-769d-4b0c-8179-ef51545030a3	1422	4	473	6	IPR004117, Olfactory receptor, insect	PF02949, 7tm Odorant receptor		olfactory receptor 4 [Meteorus pulchricornis]	AQN78406.1	2.73e-87	41.7
	SnocOr18	augustus_masked-scaffold346-processed-gene-0.12-mRNA-1-00002	5fcf1249-d710-4296-8aed-4719cd10c3c6	1122	6	373	6	IPR004117, Olfactory receptor, insect	PF02949, 7tm Odorant receptor		odorant receptor 46a-like [Athalia rosae]	XP_025602506.1	2.56e-47	34.7
	SnocOr19	augustus_masked-scaffold389-processed-gene-0.82-mRNA-1-00002	3a6698cb-b657-4d74-a240-6b9d56626056	1368	6	455	6	IPR004117, Olfactory receptor, insect	PF02949, 7tm Odorant receptor		odorant receptor 22c-like [Athalia rosae]	XP_020710980.2	2.03e-120	45.8
	SnocOr20	augustus_masked-scaffold400-processed-gene-1.15-mRNA-1-00001	decba12e-6caa-4f00-a907-0b00d95bbd2d	1221	6	406	5	IPR004117, Olfactory receptor, insect	PF02949, 7tm Odorant receptor		odorant receptor 30a-like [Polistes canadensis]	XP_019884040.1	2.35e-96	41.7
	SnocOr21	augustus_masked-scaffold400-processed-gene-1.17-mRNA-1-00001	e0e6fb60-c6ae-49e9-ad77-7a5f5a10e7f0	1122	6	373	5	IPR004117, Olfactory receptor, insect	PF02949, 7tm Odorant receptor		odorant receptor 30a [Cephus cinctus]	XP_015605665.1	1.84e-107	46.1
	SnocOr22	augustus_masked-scaffold501-processed-gene-0.160-mRNA-1-00002	053a44ef-f323-473a-bec4-225ce2308e93	1218	6	405	7	IPR004117, Olfactory receptor, insect	PF02949, 7tm Odorant receptor		odorant receptor 13a-like isoform X1 [Athalia rosae]	XP_012256242.2	2.82e-79	36.3
	SnocOr23	augustus_masked-scaffold975-processed-gene-0.2-mRNA-1-00002	ce8dbd40-2082-464b-9b9e-4fb998dd00f6	1299	7	432	6	IPR004117, Olfactory receptor, insect	PF02949, 7tm Odorant receptor		odorant receptor 13a-like [Atta cephalotes]	XP_012059513.1	7.77e-104	45.5
	SnocOr24	genemark-scaffold232-processed-gene-0.81-mRNA-1-00001	a7158cf9-20a6-4f12-8703-af7c87ae056e	1242	5	413	6	IPR004117, Olfactory receptor, insect	PF02949, 7tm Odorant receptor		odorant receptor Or2-like [Megachile rotundata]	XP_003700933.2	8.40e-117	47.0
	SnocOr25	genemark-scaffold2379-processed-gene-0.9-mRNA-1-00001	4b95b4fc-32ea-46db-ba69-0b7e981359b6	969	6	322	4	IPR004117, Olfactory receptor, insect	PF02949, 7tm Odorant receptor		odorant receptor 13a-like [Pogonomyrmex barbatus]	XP_025073324.1	9.21e-74	44.3
	SnocOr26	genemark-scaffold93-processed-gene-2.11-mRNA-1-00001	e5fd07b1-b2c3-4550-9fd6-efb9bc707ae9	1155	6	384	6	IPR004117, Olfactory receptor, insect	PF02949, 7tm Odorant receptor		putative odorant receptor 71a [Cephus cinctus]	NP_001310776.1	4.79e-97	45.5
	SnocOr27	maker-scaffold180-augustus-gene-1.11-mRNA-1-00001	5d5724c0-0d82-49c3-b85c-06e1288aa27c	1167	6	388	5	IPR004117, Olfactory receptor, insect	PF02949, 7tm Odorant receptor		odorant receptor 82a-like [Ceratina calcarata]	XP_017875835.1	6.33e-106	44.8
	SnocOr28	maker-scaffold2403-augustus-gene-0.1-mRNA-1-00002	53e79a96-d434-49a2-8918-37d0de90aef3	949	4	316	6	IPR004117, Olfactory receptor, insect	PF02949, 7tm Odorant receptor		odorant receptor 13a-like [Cyphomyrmex costatus]	XP_012059513.1	1.65e-76	42.6
	SnocOr29	maker-scaffold2558-exonerate_est2genome-gene-0.10-mRNA-1-00002	f5c5b12f-9dc4-4301-820b-1526ae4b6ac5	1012	5	337	5	IPR004117, Olfactory receptor, insect	PF02949, 7tm Odorant receptor		odorant receptor 13a-like [Atta cephalotes]	XP_012059513.1	1.67e-79	41.8
	SnocOr30	maker-scaffold829-augustus-gene-0.28-mRNA-1-00004	d8abc6ee-b169-4513-af9a-288e67b7a834	940	4	313	4	IPR004117, Olfactory receptor, insect	PF02949, 7tm Odorant receptor		odorant receptor 13a-like [Atta cephalotes]	XP_012059513.1	3.71e-71	46.7
	SnocOr31	augustus_masked-scaffold77-processed-gene-2.1-mRNA-1-00002	bd72a4a4-3cd9-4e4f-a5c8-8e2a4dbf406f	1245	6	414	6	IPR004117, Olfactory receptor, insect	PF02949, 7tm Odorant receptor		odorant receptor Or2-like [Orussus abietinus]	XP_023287517.1	1.73e-169	60.7
	SnocOr32	augustus_masked-scaffold77-processed-gene-2.1-mRNA-1-00003	8b680adc-fde7-4a2b-90b1-ed4914932e87	840	4	280	3	IPR004117, Olfactory receptor, insect	PF02949, 7tm Odorant receptor		odorant receptor 82a isoform X3 [Cephus cinctus]	XP_015595443.1	1.52e-87	45.6
	SnocOr33	augustus_masked-scaffold776-processed-gene-0.0-mRNA-1-00002	e213f3a6-f4dd-45a6-8387-8a7edca4dfcc	945	6	314	4	IPR004117, Olfactory receptor, insect	PF02949, 7tm Odorant receptor		odorant receptor 24a isoform X2 [Cephus cinctus]	XP_015608437.1	1.55e-106	51.8
	SnocOr34	augustus_masked-scaffold776-processed-gene-0.0-mRNA-1-00005	1a0f6ea4-1d6c-47ab-a909-da9ca82a6f10	1107	5	369	4	IPR004117, Olfactory receptor, insect	PF02949, 7tm Odorant receptor		odorant receptor 24a isoform X2 [Cephus cinctus]	XP_015608437.1	3.85e-87	36.9
	SnocOr35	augustus_masked-scaffold776-processed-gene-0.0-mRNA-1-00006	84d09b43-67e1-4571-b0b6-258187e52250	1155	6	384		IPR004117, Olfactory receptor, insect	PF02949, 7tm Odorant receptor		odorant receptor 24a isoform X2 [Cephus cinctus]	XP_015608437.1	1.45e-120	47.4
	SnocOr36	augustus_masked-scaffold776-processed-gene-0.0-mRNA-1-00007	81633b0d-a74a-475b-84ae-1e54a0aa16cf	1104	5	368	6	IPR004117, Olfactory receptor, insect	PF02949, 7tm Odorant receptor		odorant receptor 24a isoform X2 [Cephus cinctus]	XP_015608437.1	9.45e-130	48.8
	SnocOr37	augustus_masked-scaffold776-processed-gene-0.0-mRNA-1-00009	53180944-8f83-4294-a3e2-c49b2a02b0af	1083	6	360	4	IPR004117, Olfactory receptor, insect	PF02949, 7tm Odorant receptor		odorant receptor 24a isoform X2 [Cephus cinctus]	XP_015608437.1	5.25e-96	43.5
	SnocOr38	augustus_masked-scaffold829-processed-gene-0.34-mRNA-1-00001	09a8f2f3-230d-4e3a-be44-b7f39e781349	1302	7	433	6	IPR004117, Olfactory receptor, insect	PF02949, 7tm Odorant receptor		odorant receptor 13a-like [Trachymyrmex cornetzi]	XP_018369327.1	1.06e-100	42.2
	SnocOr39	augustus_masked-scaffold945-processed-gene-0.2-mRNA-1-00001	2b145aba-69ea-43b6-ba22-8aa484465af9	939	4	312	4	IPR004117, Olfactory receptor, insect	PF02949, 7tm Odorant receptor		odorant receptor 13a-like [Cyphomyrmex costatus]	XP_011062734.1	2.80e-69	45.4
	SnocOr40	augustus_masked-scaffold945-processed-gene-0.3-mRNA-1 -00001	1ea46697-6016-41f2-be23-5939149998e3	855	4	284	4	IPR004117, Olfactory receptor, insect	PF02949, 7tm Odorant receptor		odorant receptor 13a-like [Cyphomyrmex costatus]	XP_018393407.1	8.63e-62	43.4
	SnocOr41	maker-scaffold2298-exonerate_protein2genome-gene-0.6-mRNA-1-00003	a631bd4d-487f-4567-9c82-eaf56edecfba	855	4	284	4	IPR004117, Olfactory receptor, insect	PF02949, 7tm Odorant receptor		PREDICTED: odorant receptor 4-like [Atta colombica]	XP_015181189.1	8.85e-52	40.6
	SnocOr42	model.scaffold406.2-00002	f657b86a-9947-497f-bff1-9c66a55fd8e1	1179	9	392	6	IPR004117, Olfactory receptor, insect	PF02949, 7tm Odorant receptor		odorant receptor 13a isoform X2 [Cephus cinctus]	XP_015602817.1	4.08e-131	55.4
	SnocOr43	model.scaffold499.7-00003	5f6bdbb7-8e74-44d6-9495-00d6263ecb62	1095	6	364	4	IPR004117, Olfactory receptor, insect	PF02949, 7tm Odorant receptor		odorant receptor 294 isoform X1 [Nasonia vitripennis]	XP_014610720.1	6.37e-56	41.0
	SnocOr44	augustus_masked-scaffold1111-processed-gene-0.16-mRNA-1-00001	456e6338-09a2-4896-99ae-a32b56fc6505	1245	6	415	5	IPR004117, Olfactory receptor, insect	PF02949, 7tm Odorant receptor		odorant receptor 13a-like [Cyphomyrmex costatus]	XP_018393407.1	5.38e-45	38.2
GR	SnocGr1	augustus_masked-scaffold110-processed-gene-0.80-mRNA-1-00002	11683ad3-340a-4eb8-93ce-ee557fbd30a2	1080	5	359	5	IPR013604 7TM chemoreceptor	PF08395		uncharacterized protein LOC105702926 [Orussus abietinus]	XP_012286310.1	1.57e-104	47.3
	SnocGr2	augustus_masked-scaffold110-processed-gene-0.81	7d4b33b0-b7ce-4d0b-8413-45b3a4e4c031	1062	5	353	6	IPR013604 7TM chemoreceptor	PF08395		gustatory receptor 10 [Nasonia vitripennis]	NP_001177436.1	1.45e-82	42.1
	SnocGr3	augustus_masked-scaffold236-processed-gene-3.195-mRNA-1-00003	24bfc20c-c359-480a-ba3c-e79aa9813900	1350	6	449	6	IPR013604 7TM chemoreceptor	PF08395		gustatory receptor for sugar taste 43a [Orussus abietinus]	XP_012270798.1	1.28e-138	50.8
	SnocGr4	augustus_masked-scaffold236-processed-gene-3.195-mRNA-1-00002	f7666d69-8277-455c-b71d-c0b754d5e321	1299	8	432	7	IPR013604 7TM chemoreceptor	PF08395		gustatory receptor for sugar taste 43a isoform X6 [Cephus cinctus]	XP_015591956.1	4.55e-105	43.8
	SnocGr5	augustus_masked-scaffold25-processed-gene-2.12-mRNA-1-00001	fbda317a-c0b4-4686-bb0c-a7d842e4edac	1404	9	467	6	IPR009318 Gustatory receptor	PF06151		gustatory receptor for sugar taste 64e-like isoform X5 [Athalia rosae]	XP_012254228.2	4.50e-178	65.1
	SnocGr6	augustus_masked-scaffold25-processed-gene-2.13-mRNA-1-00001	5afeddec-7528-4669-9037-47be094ae99a	1452	11	483	6	IPR009318 Gustatory receptor	PF06151		gustatory receptor for sugar taste 64f isoform X2 [Cephus cinctus]	XP_015596524.1	5.57e-212	66.3
	SnocGr7	augustus_masked-scaffold293-processed-gene-1.142-mRNA-1-00001	b971625d-12e1-424e-b007-e3f3875aa75a	1296	4	431	6	IPR013604 7TM chemoreceptor	PF08395		uncharacterized protein LOC107268600 [Cephus cinctus]	XP_024941651.1	2.76e-60	36.7
	SnocGr8	augustus_masked-scaffold50-processed-gene-3.9-mRNA-1-00001	b2167cf4-7c53-45b2-9a3e-ef67ac5c73b7	1260	3	419	7	IPR013604 7TM chemoreceptor	PF08395		PREDICTED: uncharacterized protein LOC107227825 [Neodiprion lecontei]	XP_015524571.1	5.62e-166	59.8
	SnocGr9	augustus_masked-scaffold60-processed-gene-0.9-mRNA-1-00001	67de04db-bef4-42b1-b896-203fd918de30	1248	6	415	6	IPR013604 7TM chemoreceptor	PF08395		putative gustatory receptor 28b [Harpegnathos saltator]	XP_025163427.1	2.64e-67	34.1
	SnocGr10	augustus_masked-scaffold13-processed-gene-2.37-mRNA-1	12c53af5-0244-4184-ac37-c62ebc1de540/augustus_masked-scaffold13-processed-gene-2.37-mRNA-1	1674	6	557	5	IPR013604 7TM chemoreceptor	PF08395		uncharacterized protein LOC107270397 [Cephus cinctus]	XP_015600863.1	1.40e-16	28.6
	SnocGr11	augustus_masked-scaffold424-processed-gene-0.72-mRNA-1	3c94e9b7-e2fa-43e4-b423-76e4c0265859/augustus_masked-scaffold424-processed-gene-0.72-mRNA-1	1104	5	367	6	IPR013604 7TM chemoreceptor	PF08395		gustatory receptor [Anopheles darlingi]	ETN67173.1	6.19e-18	22.8
	SnocGr12	augustus_masked-scaffold809-processed-gene-0.24-mRNA-1	68fea945-484d-45ed-b029-19b7452b910d	1020	4	339	7	IPR013604 7TM chemoreceptor	PF08395		uncharacterized protein LOC107264602 isoform X2 [Cephus cinctus]	XP_024937685.1	1.37e-46	30.4
IR	SnocIr01	augustus_masked-scaffold101-processed-gene-0.106-mRNA-1	cc6fcfa5-e794-47c9-a34d-dfb824fbb1ff	1992	11	663	4	IPR019594, IPR001320, IPR005055, IPR036682	PF10613, PF03392, PF00060		Ionotropic receptor 6 [Cephus cinctus]	XP_015592502.1	60.4	5.09e-233
	SnocIr02	augustus_masked-scaffold101-processed-gene-0.107-mRNA-1	cb4943b6-332f-40a2-9cf8-2afae7fc00c7/augustus_masked-scaffold101-processed-gene-0.107-mRNA-1	1539	8	512	3	IPR001320	PF00060		Probable glutamate receptor isoform X3 [Cephus cinctus]	XP_015592505.1	58.5	4.92e-220
	SnocIr09	augustus_masked-scaffold175-processed-gene-1.28-mRNA-1-00001	e75937f6-b75b-4690-ae63-485e1481fea9	1293	7	430	1	IPR019594	PF10613		Uncharacterized protein LOC107272912 isoform X2 [Cephus cinctus]	XP_015606065.1	53.4	1.59e-148
	SnocIr10	augustus_masked-scaffold210-processed-gene-3.160-mRNA-1	6b179cfa-bf27-4482-a628-2cdac7ba6ff3	1833	1	610	2			SignalP-noTM	Uncharacterised protein LOC112483679 [Cephus cinctus]	XP_024935920.1	35.0	5.31e-101
	SnocIr11	augustus_masked-scaffold225-processed-gene-0.22-mRNA-1a-00001	814d7e8e-a5b2-4a82-8085-af90043cc3ae	2231	4	743	4			SignalP-noTM	Uncharacterized protein LOC107275120 isoform X1 [Cephus cinctus]	XP_015610416.1	44.1	1.14e-191
	SnocIr12	augustus_masked-scaffold225-processed-gene-0.23-mRNA-1	492dfad0-6d19-4948-973f-66affd9cb34d	1857	3	618	3			SignalP-noTM	Unchracterized protein LOC105687439	XP_015587376.1	37.5	5.56e-127
	SnocIr13	augustus_masked-scaffold225-processed-gene-0.8-mRNA-1	c88aaaeb-95c6-4551-ae61-6b2df27a473f	1890	2	629	3			SignalP-noTM	Uncharacterized protein LOC105249180 [ Cmaponotus floridanus]	XP_011252770.3	40.7	4.82e-145
	SnocIr14	augustus_masked-scaffold2440-processed-gene-0.9-mRNA-1	979ab827-f9ef-4171-9499-ead4e4f8b329	2283	9	760	2	IPR001320, IPR019594	PF00060, PF10613		Glutamate recptor ionotropic, kainate 4 isoform X2 [Cephus cinctus]	XP_015593877.1	38.1	2.46e-90
	SnocIr15	augustus_masked-scaffold2467-processed-gene-0.14-mRNA-1-0001	6538f71e-0397-45ff-bb18-847e3429b7c2	1269	5	422	1	IPR019594, IPR001320	PF10613		PREDICTED: probable glutamate receptor [Acromyrmex echinatior]	XP_018307131.1	35.9	1.04e-32
	SnocIr18	augustus_masked-scaffold261-processed-gene-3.6-mRNA-1	bf78f756-698d-44ce-9cd3-c10f8ce87fa3	1827	2	608	3	IPR001320	PF00060		Glutamate receptor 2.5-like [Athalia rosae]	XP_020710802.1	27.2	3.96e-46
	SnocIr19	augustus_masked-scaffold276-processed-gene-0.43-mRNA-1	f0224743-91c8-48a5-a310-982a01ebed54	1824	1	607	2	IPR001320	PF00060		Glutamate receptor 2.5-like [Athalia rosae]	XP_020710802.1	42.5	6.85e-147
	SnocIr20	augustus_masked-scaffold283-processed-gene-0.6-mRNA-1-00001	7095351b-153c-487a-97a1-c271d05f2727	1161	2	386	3	IPR001320	PF00060		Uncharacterized protein LOC107263735 [ Cephus cinctus]	XP_024936876.1	52.5	1.53e-123
	SnocIr22	augustus_masked-scaffold287-processed-gene-0.112-mRNA-1	a5965097-31d5-47e9-aacc-d74050aa1fec	2073	2	690	1				Ionotropic receptor 114 [Cephus cinctus]	XP_024945379.1	33.3	1.95e-68
	SnocIr23	augustus_masked-scaffold298-processed-gene-0.72-mRNA-1	154e9c9e-cadc-4d2a-8dd3-31ec212426a6	1794	1	597	4			SignalP-noTM	Uncharacterized protein LOC107263735 isoform X1 [Cephus cinctus]	XP_015520990.1	22.9	4.21e-19
	SnocIr24	augustus_masked-scaffold32-processed-gene-2.232-mRNA-1	63bcd5d3-8293-4cd0-9356-6e315d8021fd	2058	5	685	3	IPR001320	PF00060		Uncharacterized protein LOC105696125 isoform X2 [Orussus abietinus]	XP_012270958.1	33.3	5.94e-63
	SnocIr25	augustus_masked-scaffold328-processed-gene-1.2-mRNA-1	c46e4d82-dd9b-4706-a408-a97fadd85620	1827	9	608	1			SignalP-noTM	Probably glutamate receptor isoform X2 [Cephus cinctus]	XP_015595978.1	56.6	2.06e-243
	SnocIr26	augustus_masked-scaffold343-processed-gene-0.409-mRNA-1	2833fd40-7bc3-4576-b53e-f11be8458d88	1860	4	619	1			SignalP-noTM	Hypothetical protein L798_03054 [Zootermopsis nevadensis]	KDR22030.1	29.1	3.08e-40
	SnocIr27	augustus_masked-scaffold365-processed-gene-0.3-mRNA-1	21d45963-5977-472b-b544-f6bab179c806	1425	1	474	3	IPR001320, IPR001638	PF00060		Ionotropic receptor 873 [Blattella germanica]	XP_023289183.1	63.0	3.03e-200
	SnocIr28	augustus_masked-scaffold369-processed-gene-1.224-mRNA-1c-0001	11e5268d-a19a-449b-8373-14b947cc45be	1794	10	597	5	IPR001320	PF00060		Ionotropic receptor 21a isoform X1 [Cephus cinctus]	XP_015587011.1	68.7	1.09e-265
	SnocIr30	augustus_masked-scaffold408-processed-gene-0.4-mRNA-1	4b4a864e-1198-420c-8f7c-eed56b1dd693	4068	7	1355	5	IPR019594, IPR001320, IPR001638, IPR028082	PF00060		Uncharacterized protein LOC107270719 isoform X1 [Cephus cinctus]	XP_015601474.1	80.8	0.0
	SnocIr31	augustus_masked-scaffold41-processed-gene-0.185-mRNA-1-0001	2baa1af9-8e05-46ce-8971-27c29001335e	2503	13	834	2	IPR001320	PF00060		ionotropic receptor 93a isoform X1 [Cephus cinctus]	XP_015598828.1	61.6	0.0
	SnocIr32	augustus_masked-scaffold418-processed-gene-0.16-mRNA-1	41e3da90-c0f3-4816-bb5f-838ec084ba7a	1848	1	615	3			SignalP-noTM	hypothetical protein RR48_03756 [Papilio machaon]	KPJ08650.1	20.6	5.03e-18
	SnocIr33	augustus_masked-scaffold43-processed-gene-3.32-mRNA-1-0003	dba96d86-b3b0-4920-8865-618e6992a251	1956	3	651	3			SignalP-noTM	Uncharacterized protein LOC105683354 [Athalia rosae]	XP_012251314.1	36.1	4.90e-107
	SnocIr34	augustus_masked-scaffold453-processed-gene-0.2-mRNA-1	f7518747-6ff8-4d09-8bea-42835d54e4b8	2718	14	905	2	IPR001828, IPR019594, IPR028082, IPR001508, IPR001320	PF01094, PF00060, PF10613	SignalP-noTM	glutamate receptor ionotropic, kainate 2 [Orussus abietinus]	XP_012273738.1	65.5	0.0
	SnocIr35	augustus_masked-scaffold453-processed-gene-0.3-mRNA-1	67c90f14-77c4-4488-b2f4-896eaebfd27c	2454	15	817	3	IPR001320, IPR019594, IPR001828, IPR028082	PF00060, PF10613, PF01094		glutamate receptor ionotropic, kainate 2 [Athalia rosae]	XP_012263948.1	81.4	0.0
	SnocIr36	augustus_masked-scaffold46-processed-gene-4.112-mRNA-1-0002	093d3aed-5049-4df4-bc0b-4b2c9d17536d	1821	4	606	3					XP_021914642.1	30.2	1.28e-23
	SnocIr37	augustus_masked-scaffold616-processed-gene-0.69-mRNA-1	37df3495-9f74-40cf-9caf-4db2e3c00bec	1716	6	571	3				uncharacterized protein LOC107266559 [Cephus cinctus]	XP_015592660.1	29.6	8.03e-66
	SnocIr8a	augustus_masked-scaffold7-processed-gene-3.116-mRNA-1 (gene id changed to SnocIr8a)	d92d0b14-f9c4-4b60-ad7d-8def32a9b95e	2556	16	851	3	IPR019594, IPR001320, IPR001508	PF00060, PF10613		PREDICTED: glutamate receptor ionotropic, kainate 2 [Linepithema humile]	XP_012217463.1	70.7	0.0
	SnocIr43	augustus_masked-scaffold76-processed-gene-1.16-mRNA-1-0002	d86b23b0-2770-4cee-a97a-f299522ded27	1962	10	653	3				Probable glutamate receptor isoform X1 [Athalia rosae]	XP_020707554.1	46.6	6.12e-201
	SnocIr44	augustus_masked-scaffold82-processed-gene-1.3-mRNA-1	7d22267e-80e3-4ba9-a5ea-89c24b2f5b2f	1836	3	611	2	IPR001320	PF00060		uncharacterized protein LOC110117405 [Athalia rosae]	XP_020711886.1	27.0	1.31e-33
	SnocIr45	genemark-scaffold553-processed-gene-0.1-mRNA-1	1e5bb1c8-6567-4ea1-84f2-6db41c4ed8e6	2802	5	933	3	IPR001320, IPR019594, IPR001508	PF10613, PF00060		ionotropic receptor 25a [Cephus cinctus]	XP_015585435.1	80.4	0.0
	SnocIr46	maker-scaffold21-exonerate_protein2genome-gene-0.29-mRNA-1-0002	26989991-307a-41cc-b661-211f7d920bf7	2973	18	990	3	IPR001320, IPR019594, IPR028082	PF10613, PF00060		Glutamate receptor 1 [Cephus cinctus]	XP_015589085.1	92.9	0.0
	SnocIr47	maker-scaffold24-exonerate_est2genome-gene-2.119-mRNA-1	5c0fad84-b9d0-498e-a90c-efcd66575ba8	2753	15	917	3	IPR001508, IPR019594, IPR001320, IPR001828, IPR028082	PF10613, PF00060, PF01094		Glutamate receptor ionotropic, kainate 2 [Orussus abietinus]	XP_012273732.1	65.8	0.0
	SnocIr48	maker-scaffold255-augustus-gene-2.115-mRNA-1	fbc47fee-4267-4444-ba83-61827dfd939c	2874	17	957	4	IPR001508, IPR019594, IPR001320, IPR028082, IPR018882	PF00060, PF10562, PF01094, PF10613		XP_015598451.1 glutamate [NMDA] receptor subunit 1 isoform X2 [Cephus cinctus]	XP_015598451.1	88.9	0.0
	SnocIr49	maker-scaffold341-exonerate_protein2genome-gene-0.75-mRNA-1-0004	a229e152-9537-41ff-9233-834fa11786b7	1851	12	616	0	IPR019594, IPR001320, IPR001828, IPR028082	PF10613, PF01094		Predicted: glutamate receptor ionotropic, kainate 1-like isoform X1 [Apis florea]	XP_012339189.1	90.4	0.0
	SnocIr50	maker-scaffold365-augustus-gene-0.30-mRNA-1	602cdadb-0b2e-4168-b8ee-d04e56ef0230	1425	7	475	3	IPR001320, IPR001638	PF00060		Uncharacterized protein LOC105696466 [Orussus abietinus]	XP_023289183.1	63.0	3.03e-200
	SnocIr51	maker-scaffold42-augustus-gene-0.46-mRNA-1	e37a7381-a438-468f-af03-01558f76998c	3393	17	1130	4	IPR019594, IPR001320, IPR001508, IPR001828, IPR028082	PF00060, PF01094, PF10613		glutamate receptor ionotropic, NMDA 2B isoform X5 [Ooceraea biroi]	XP_011338403.1	81.4	0.0
	SnocIr53	maker-scaffold89-augustus-gene-1.38-mRNA-1	1c8d1ad5-738d-4a04-94ce-6b862793097d	2391	9	796	5	IPR001320	PF00060		Uncharacterized protein LOC105697490 [Orussus abietinus]	XP_023288062.1	70.7	0.0
	SnocIr54	model.scaffold452.1	350ed5b9-86ac-40a4-b8fd-c6e650f7dc47	2133	9	710	4	IPR001320	PF00060		glutamate receptor ionotropic, kainate 4-like [Megachile rotundata]	XP_012139079.1	54.9	1.45e-276
OBP	SnocOBP1	augustus_masked-scaffold210-processed-gene-4.146-mRNA-1	dc6fa02a-0840-4aca-a111-9c2ba7bc0af8	762	6	253	0	IPR036728			general odorant-binding protein 71 [Cephus cinctus]	XP_015604958.1	44.7	1.17e-47
	SnocOBP2	scaffold335a-00001	abe582ff-ee65-44c5-8012-27a433dc2e71	423	4	140	0	IPR036728, IPR006170	PF01395		uncharacterized protein LOC110117265 [Athalia rosae]	XP_020710790.1	31.2	1.31e-08
	SnocOBP3	augustus_masked-scaffold335-processed-gene-1.61-mRNA-1-00004	05178544-8053-4d7a-a4f6-73b846ad6052	414	6	137	0	IPR036728, IPR006170	PF01395		odorant-binding protein 3 [Oedaleus asiaticus]	AKC02194.1	32.2	4.46e-12
	SnocOBP4	augustus_masked-scaffold335-processed-gene-1.61-mRNA-1-00003	dbe124f7-ecd7-4606-af19-9662d6290c9d	396	5	131	1	IPR036728, IPR006170	PF01395		odorant binding protein 10 [Cephus cinctus]	ARN17866.1	66.9	2.05e-57
	SnocOBP5	augustus_masked-scaffold335-processed-gene-1.61-mRNA-1-00002	662e97a3-c75b-4d5b-ba56-f6d4bd4ed633	402	6	133	0	IPR036728, IPR006170	PF01395		uncharacterized protein LOC105690787 [Athalia rosae]	XP_012264292.1	42.5	2.19e-26
	SnocOBP6	augustus_masked-scaffold37-processed-gene-3.23-mRNA-1	e4c11712-f735-4668-8c33-9cf5f3645c28	417	5	138	0	IPR036728, IPR006170	PF01395		B1 protein-like [Athalia rosae]	XP_012264288.1	44.4	7.32e-28
	SnocOBP7	augustus_masked-scaffold542-processed-gene-0.15-mRNA-1-0004	0b518a7b-dd23-48b1-8613-b2a63127e332	420	5	139	0	IPR036728, IPR006170	PF01395		uncharacterized protein LOC100650085 [Bombus terrestris]	XP_003397906.1	28.8	1.95e-12
	SnocOBP8	augustus_masked-scaffold542-processed-gene-0.15-mRNA-1-0005	294edcac-55c5-4546-9f91-d566d09bdb95	423	6	140	0	IPR036728, IPR006170	PF01395		odorant binding protein 2 [Macrocentrus cingulum]	ASM47934.1	44.4	2.23e-34
	SnocOBP9	augustus_masked-scaffold542-processed-gene-0.15-mRNA-1-0006	20484875-9fdf-442f-8b5b-bc65f93a21d4	426	5	141	0	IPR036728, IPR006170	PF01395		odorant binding protein 1 [Cephus cinctus]	ARN17857.1	53.7	1.32e-41
	SnocOBP10	augustus_masked-scaffold623-processed-gene-0.141-mRNA-1a-00001	fdc20b97-d640-45c7-a104-cc77b17c4902	387	6	129	0	IPR036728, IPR006170	PF01395		general odorant-binding protein 83a [Cephus cinctus]	XP_015601898.1	55.0	1.70e-44
	SnocOBP11	scaffold813a-00001	68aaa8e8-62f8-4372-af3f-187d7d3e4466	414	6	137	1	IPR036728, IPR006170	PF01395		odorant binding protein 1 [Sclerodermus sp. MQW-2015]	ALG36134.1	41.0	2.39e-30
	SnocOBP12	scaffold813-00001	cf29582c-5e27-4e39-a30d-712af44a21b9	414	4	137	0	IPR036728, IPR006170	PF01395		general odorant-binding protein 69a [Orussus abietinus]	XP_012278867.1	76.5	1.04e-61
	SnocOBP13	genemark-scaffold5-processed-gene-1.40-mRNA-1	1f0debd8-e1e8-4b05-97e6-97800a6ec316	486	6	161	1	IPR036728, IPR006170	PF01395		uncharacterized protein LOC107266700 [Cephus cinctus]	XP_015592933.1	59.6	9.10e-54
	SnocOBP14	model.scaffold49.1	3665d239-d242-40fe-8fef-b4683a659570	408	5	136	0	IPR036728, IPR006170	PF01395		general odorant-binding protein 69a [Cephus cinctus]	XP_015585661.1	43.2	2.05e-36
CSP	SnocCSP1	augustus_masked-scaffold113-processed-gene-0.140	a3a9e2bd-34e6-4213-ab70-1c4489a9eb2b	417	3	138	0	IPR005055, IPR036682	PF03392		ejaculatory bulb-specific protein 3 [Cephus cinctus]	XP_015592599.1	78.5	4.08e-76
	SnocCSP2	augustus_masked-scaffold185-processed-gene-1.4	efc2dc8a-b0d8-4667-b148-994acc51243e	351	4	116	0	IPR005055, IPR036682	PF03392		ejaculatory bulb-specific protein 3-like [Megachile rotundata]	XP_003708519.1	78.3	4.02e-63
	SnocCSP3	scaffold229-00001	9e3ca658-aabf-467d-9e4d-e2904b20f155	477	2	158	0	IPR005055, IPR036682	PF03392		ejaculatory bulb-specific protein 3 isoform X2 [Bombus terrestris]	XP_003396495.1	54.4	9.15e-50
	SnocCSP4	augustus_masked-scaffold319-processed-gene-0.13	469f32cb-a18e-4c51-9ee3-9122937fd4bf	345	3	114	0	IPR005055, IPR036682	PF03392		ejaculatory bulb-specific protein 3 [Cephus cinctus]	XP_015603660.1	81.1	6.19e-57
	SnocCSP5	augustus_masked-scaffold329-processed-gene-1.74	9be14c29-8ab8-4794-95f3-d78d251a7859	417	4	138	1	IPR005055, IPR036682	PF03392		ejaculatory bulb-specific protein 3 [Cephus cinctus]	XP_015608690.1	78.9	5.51e-69
	SnocCSP6	scaffold979-00001	7ebe6fb4-6fcb-43df-9f7f-de91fcd84189	306	2	101	1	IPR005055, IPR036682	PF03392		ejaculatory bulb-specific protein 3 [Cephus cinctus]	XP_015585244.1	69.7	8.74e-45
	SnocCSP7	genemark-scaffold101-processed-gene-0.81-mRNA-1-00001	ab9fee27-d82f-49b3-bfc4-11497d99fd8a	438	2	145	1	IPR005055, IPR036682	PF03392		ejaculatory bulb-specific protein 3 [Orussus abietinus]	XP_012273360.1	65.3	2.94e-50
	SnocCSP8	maker-scaffold113-augustus-gene-0.146	ee7a74e6-5e69-47e6-8c2c-c174ae1d8b6f	396	2	131	0	IPR005055, IPR036682	PF03392		chemosensory protein 7 [Sclerodermus sp. MQW-2015]	ALG36160.1	61.7	8.96e-58
	SnocCSP9	maker-scaffold979-augustus-gene-0.11	c3982bae-2287-4941-b382-da5e7fa348ea	375	2	124	0	IPR005055, IPR036682	PF03392		ejaculatory bulb-specific protein 3 [Cephus cinctus]	XP_015585231.1	73.4	5.83e-60
SNMP	SnocSNMP1	augustus_masked-scaffold248-processed-gene-2.201-mRNA-1	ac69b24b-f4b6-47d0-9477-2f69eb51d2f6	1581	8	526	2	IPR002159 (CD36 family)	PF01130		sensory neuron membrane protein 1 [Cephus cinctus]	XP_015587038.1	72.1	4.44e-294
