# Supplementary material for: Chemosensory gene signatures of ecological niche and behavioural specialisation in Sirex noctilio
Source: Research Square preprint supplement (doi:10.21203/rs.3.rs-3144413/v1), 2023-08-17
Supplement: Supplementary file 2 [file 702da34c9d4d26043581c520.xlsx]

## Sheet: Sheet1
	Quality control results of RNA				TruSeq stranded mRNA library quality control			Raw RNA data
Sample	Conc. (ng/ul)	Total amount	RIN	Conc. (ng/ul)	Conc. (nM)	Insert size (bp)	Total Bases	Read Count	GC (%)	AT (%)	Q20 (%)	Q30 (%)
FA1A	55.5	4.606	8.5	10.42	43.56	368	6225154594	61635194	39.923	60.077	98.099	94.43
FA2A	70.283	5.833	8.9	18.8	83.36	347	6034971594	59752194	39.745	60.255	98.148	94.43
FA3A	121.439	9.837	9	9.44	36.86	394	6325320940	62626940	39.106	60.894	97.94	93.894
MA1A	176.564	14.125	9.2	14.5	65.06	343	6472863356	64087756	39.232	60.768	98.208	94.565
MA2A	328.028	26.242	8.7	15.12	68.8	338	6668422788	66023988	39.188	60.812	98.149	94.452
MA3A	58.239	5.067	9.2	7.1	33.73	324	5424214292	53705092	40.066	59.934	98.03	94.234
FA1H	65.885	5.403	8.3	27.66	117.54	362	6040089062	59802862	40.531	59.469	97.026	92.008
FA2H	69.12	5.53	8.5	16.39	73.1	345	6030754238	59710438	40.575	59.425	98.212	94.638
FA3H	64.701	5.241	8.7	16.55	74.68	341	6705697242	66393042	40.506	59.494	98.228	94.612
MA1H	68.11	5.721	8.8	19.17	83.77	352	6124472744	60638344	41.866	58.134	98.369	95.121
MA2H	134.541	10.091	9.1	32.95	143.22	354	7805077798	77277998	41.251	58.749	98.505	95.315
MA3H	64.104	5.192	9.1	18.8	80.34	360	8871248140	87834140	43.436	56.564	98.444	95.213
FA1L	92.23	6.364	8.8	11.16	52.04	330	5187772080	51364080	42.303	57.697	97.958	94.148
FA2L	76.359	6.338	9.2	16.51	76.51	332	6173748422	61126222	41.807	58.193	98.057	94.369
FA3L	90.233	7.399	9	12.74	56.97	344	5297140536	52446936	42.238	57.762	97.816	93.879
MA1L	119.01	9.521	9.2	21.98	93.42	362	9030718656	89413056	42.114	57.886	98.562	95.546
MA2L	193.046	13.899	9.3	31.01	129.98	367	8115862676	80355076	41.507	58.493	98.455	95.234
MA3L	71.002	5.68	9.3	8.92	38.34	358	5515451834	54608434	41.419	58.581	98.271	94.842
FA1W	56.001	4.312	8.6	5.51	23.24	365	7430363354	73567954	41.206	58.794	98.422	95.231
FA2W	54.853	4.333	8.5	5.49	22.69	372	7731350626	76548026	41.807	58.193	98.304	94.916
FA3W	51.651	4.132	8.5	11.54	50.45	352	7026221550	69566550	41.903	58.097	98.469	95.224
MA1W	57.838	4.222	9.2	8.42	38.19	339	6155538324	60945924	40.634	59.366	97.905	94.033
MA2W	63.506	4.953	9	10.28	46.52	340	6218520510	61569510	40.685	59.315	97.669	93.443
MA3W	57.418	4.708	9.1	3.82	17.55	335	6133307820	60725820	43.548	56.452	98.203	94.654
Sample	Quality control results of RNA				TruSeq stranded mRNA library quality control			Raw RNA data
	Conc. (ng/ul)	Total amount	RIN	Conc. (ng/ul)	Conc. (nM)	Insert size (bp)	Total Bases	Read Count	GC (%)	AT (%)	Q20 (%)	Q30 (%)
FA1O	29.839	2.447	8.5	15.55	70.8	338	7522029338	74475538	42.189	57.811	98.465	95.253
FA2O	54.41	4.462	8.9	17.97	78.99	350	8868659712	87808512	42.399	57.601	98.426	95.143
FA3O	28.869	2.338	8.4	12.88	61.52	322	6014575250	59550250	42.28	57.72	98.362	95.117
FA1B	128.119	9.481	9	15.57	70.27	341	6012916830	59533830	41.839	58.161	98.112	94.452
FA2B	128.279	10.006	9.1	2.93	13.46	335	5869219686	58111086	41.379	58.621	97.963	94.313
FA3B	165.082	11.721	8.9	14.25	63.16	347	5812165190	57546190	41.008	58.992	98.07	94.353
MA1B	86.068	5.508	9.2	17.82	79.69	344	5968890728	59097928	41.196	58.804	98.06	94.308
MA2B	79.406	6.432	9	14.55	64.69	346	6595699556	65303956	40.56	59.44	98.075	94.306
MA3B	66.261	5.433	9.1	12.44	53.16	360	6690928214	66246814	38.875	61.125	98.034	94.173
FP1H	70.494	5.287	9.1	23.98	99.97	369	7555538108	74807308	39.302	60.698	98.463	95.19
FP2H	69.848	5.658	9.3	19.81	81.7	373	7153322172	70824972	38.914	61.086	98.485	95.256
FP3H	68.656	5.698	8.9	11.46	48.99	360	7169968790	70989790	41.533	58.467	98.285	94.888
MP1H	74.983	6.299	8.4	9.71	40.48	369	6417889258	63543458	41.666	58.334	98.376	95.113
MP2H	74.438	5.979	8.9	11.64	48.52	369	7081532786	70114186	41.063	58.937	98.397	95.11
MP3H	74.31	6.019	8	6.69	29.93	344	8657557592	85718392	42.926	57.074	98.393	95.164
FP1B	94.527	6.522	8.2	18.69	73.73	390	8305985682	82237482	32.785	67.215	98.524	95.203
FP2B	90.635	9.154	6.1	4.8	19.69	375	7029462438	69598638	33.966	66.034	98.377	94.872
FP3B	167.057	13.03	8.6	17.17	74.42	355	6311649580	62491580	35.833	64.167	98.427	95.077
MP1B	91.628	6.231	8	10.05	44.07	351	7231000262	71594062	38.93	61.07	98.531	95.407
MP2B	132.753	10.753	8.4	12.52	54.4	354	7330262254	72576854	38.633	61.367	98.454	95.145
MP3B	88.463	5.927	7.6	11.84	46.97	388	6541546790	64767790	36.94	63.06	98.469	95.173
