# Supplementary material for: Chemosensory gene signatures of ecological niche and behavioural specialisation in Sirex noctilio
Source: Research Square preprint supplement (doi:10.21203/rs.3.rs-3144413/v1), 2023-08-17
Supplement: Supplementary file 3 [file da3912f8292f5f5dd67b7fc7.docx]

1. Additional file 1: Genes identified in this study: SirexChemosensationGenesInfo.xls
2. Additional file 2: Data and references for phylogenetic analyses: ChemosensoryGenesInsectsPhylogenetics.docx
3. Additional file 3: RNA Sequencing data information: RNA libraries.xlsx
4. Additional file 4: Heatmap of DESeq countdata for all chemosensation genes: CSHM.pdf
5. Additional file 5: Phylogenetic tree of OR family: OrTreeOrco9ExonQSirexSpecific.pdf
6. Additional file 6: Heatmap of DESeq countdata for OR family: ORDESeqHeatmap.pdf
7. Additional file 7: Phylogenetic tree of GR family: GRTreeSugarFructoseCO2Pheromone16112021.pdf
8. Additional file 8: Heatmap of DESeq countdata for GR family: GRDESeqHeatmap.pdf
9. Additional file 9: Phylogenetic tree of IR family: IrTreeTiplabsAlignedAnnotatedDivergent590.pdf
10. Additional file 10: Heatmap of DESeq countdata for IR family: RDESeqHeatmap.pdf
11. Additional file 11: Phylogenetic tree of OBP genes: OBPAntWaspBee16112021.pdf
12. Additional file 12: Heatmap of DESeq countdata for OBP genes: OBPDESeqHeatmap.pdf
13. Additional file 13: Multiple sequence alignment of *Sirex* CSP amino acid sequences depicting conserved Cysteine residues: CSPConservedCys.png
14. Additional file 14: Heatmap of DESeq of countdata for CSP genes: CSPDESeqHeatmap.pdf


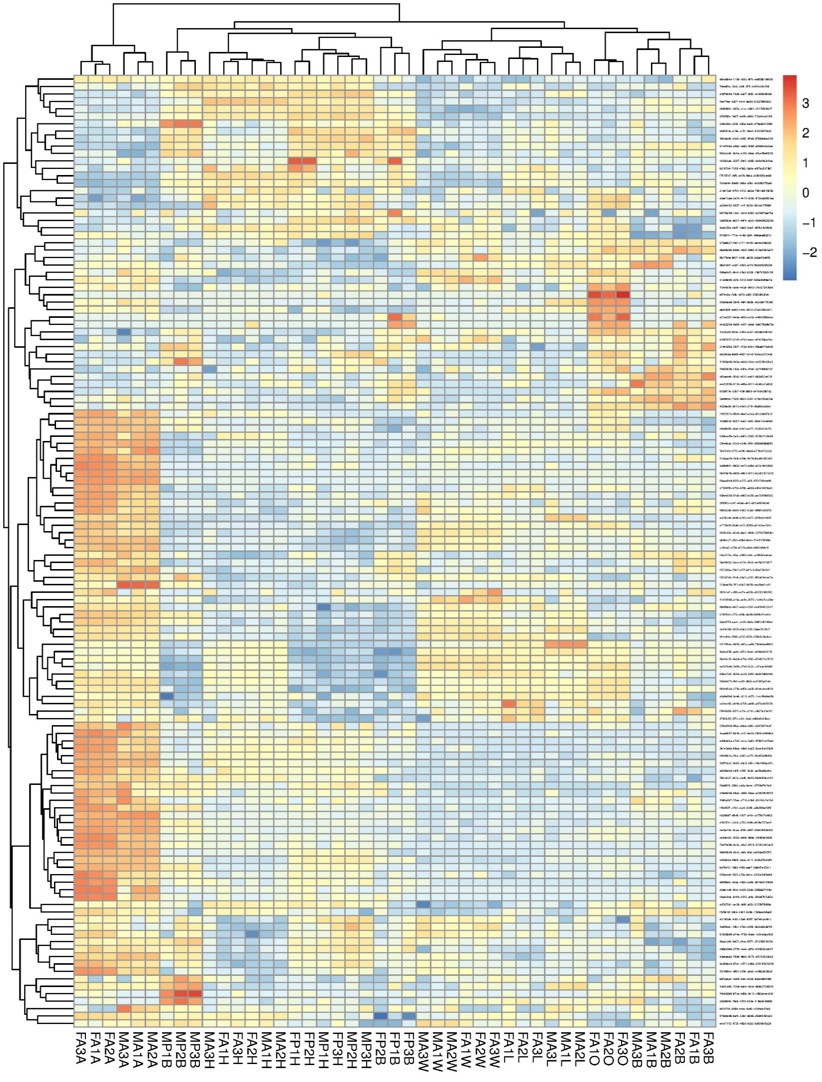


**Additional file 4:** Heatmap of chemosensation gene expression in *Sirex noctilio*. Normalised count data was used to produce this figure using the pheatmap package ([https://CRAN.Rproject.org/package=pheatmap](https://cran.rproject.org/package=pheatmap)). The tissue samples for which gene expression was measured are shown on the x-axis (for the 3 biological replicates) and chemosensation genes (Snoc*) are shown on the y-axis.

Count data was produced using featurecounts ([http://subread.sourceforge.net](http://subread.sourceforge.net/)). Gene expression data was hierarchically clustered using a k-means approach and count data was transformed using variance stabilizing transformation, both using the R DESeq2 package (Love MI, Huber W, Anders S (2014). “Moderated estimation of fold change and dispersion for RNA-seq data with DESeq2.” Genome Biology, 15, 550. doi: 10.1186/s13059-014-0550-8).


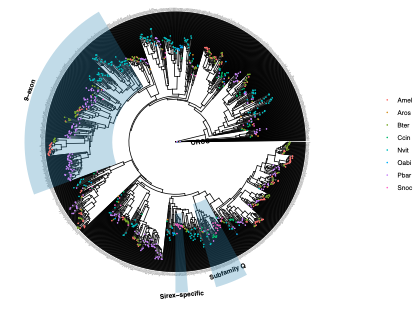


**Additional file 5:** Phylogenetic tree of OR genes from *Sirex noctilio* (Snoc), *Apis mellifera* (Amel), *Athalia rosae* (Aros), *Bombus terristris* (Bter), *Cephus cinctus* (Ccin), *Nasonia vitripennis* (Nvit), *Orussus abietinus* (Oabi) and *Pogonomyrmex barbatus* (Pbar). Sub-families of interest are highlighted: ORCO, 9-exon, Sirex-specific and Subfamily Q.


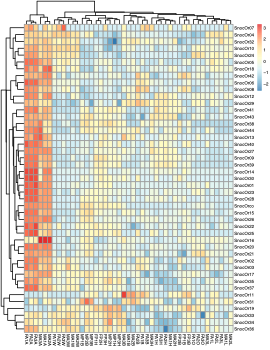


**Additional file 6:** Heatmap depicting differential expression results for OR genes in *Sirex noctilio*.

**Additional file 7:** Phylogenetic tree of GR genes from *Sirex noctilio* (Snoc), *Anopheles gambiae* (Agam), *Apis mellifera* (Amel), *Athalia rosae* (Aros), *Bombyx mori* (Bmor), *Bombus terristris* (Bter), *Cephus cinctus* (Ccin), *Drosophila melanogaster* (Dmel), *Nasonia vitripennis* (Nvit), *Orussus abietinus* (Oabi), *Pogonomyrmex barbatus* (Pbar) and *Tribolium castaneum* (Tcas). Sub-families of interest are highlighted and include: pheromone receptors, sugar and fructose receptors and carbon dioxide receptors

**Additional file 8:** Heatmap depicting differential expression results for GR genes in *Sirex noctilio*.

**Additional file 9:** Phylogenetic tree of IR genes from *Sirex noctilio* (Snoc), *Apis mellifera* (Amel), *Athalia rosae* (Aros), *Bombus terristris* (Bter), *Cephus cinctus* (Ccin), *Drosophila melanogaster* (Dmel), *Nasonia vitripennis* (Nvit), *Orussus abietinus* (Oabi) and *Pogonomyrmex barbatus* (Pbar). Sub-families of interest are highlighted and include: Divergent receptors and Co-receptors (Ir8a and Ir25a).

**Additional file 10:** Heatmap depicting differential expression results for IR genes in *Sirex noctilio*.

**Additional file 11:** Phylogenetic tree of OBP genes from *Sirex noctilio* (Snoc), *Apis mellifera* (Amel), *Cephus cinctus* (Ccin), *Nasonia vitripennis* (Nvit) and *Solenopsis invicta* (Sinv). Sub-families of interest are highlighted and include a bee-specific clade, a wasp-specific clade and an ant-specific clade.

**Additional file 12:** Heatmap depicting differential expression results for OBP genes in *Sirex noctilio*


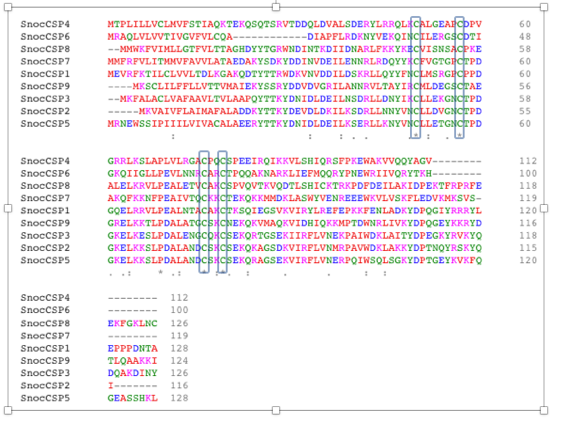


**Additional file 13:** Protein sequence alignment of Sirex noctilio Chemosensory Proteins (CSP). Conserved Cysteine-residues are highlighted with grey blocks.


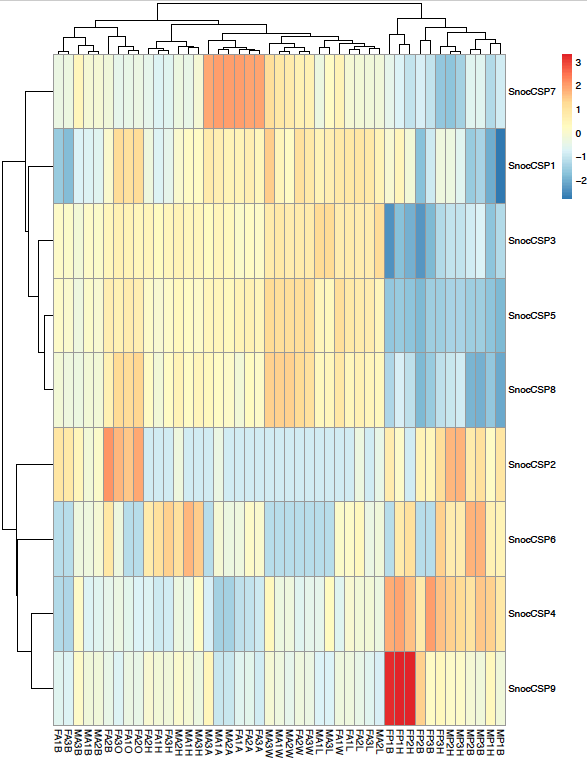


**Additional file 14:** Heatmap depicting differential expression results for CSP genes in *Sirex noctilio*
