# Supplementary figures and images for: Chemosensory gene signatures of ecological niche and behavioural specialisation in Sirex noctilio
Source: Research Square preprint supplement (doi:10.21203/rs.3.rs-3144413/v1), 2023-08-17

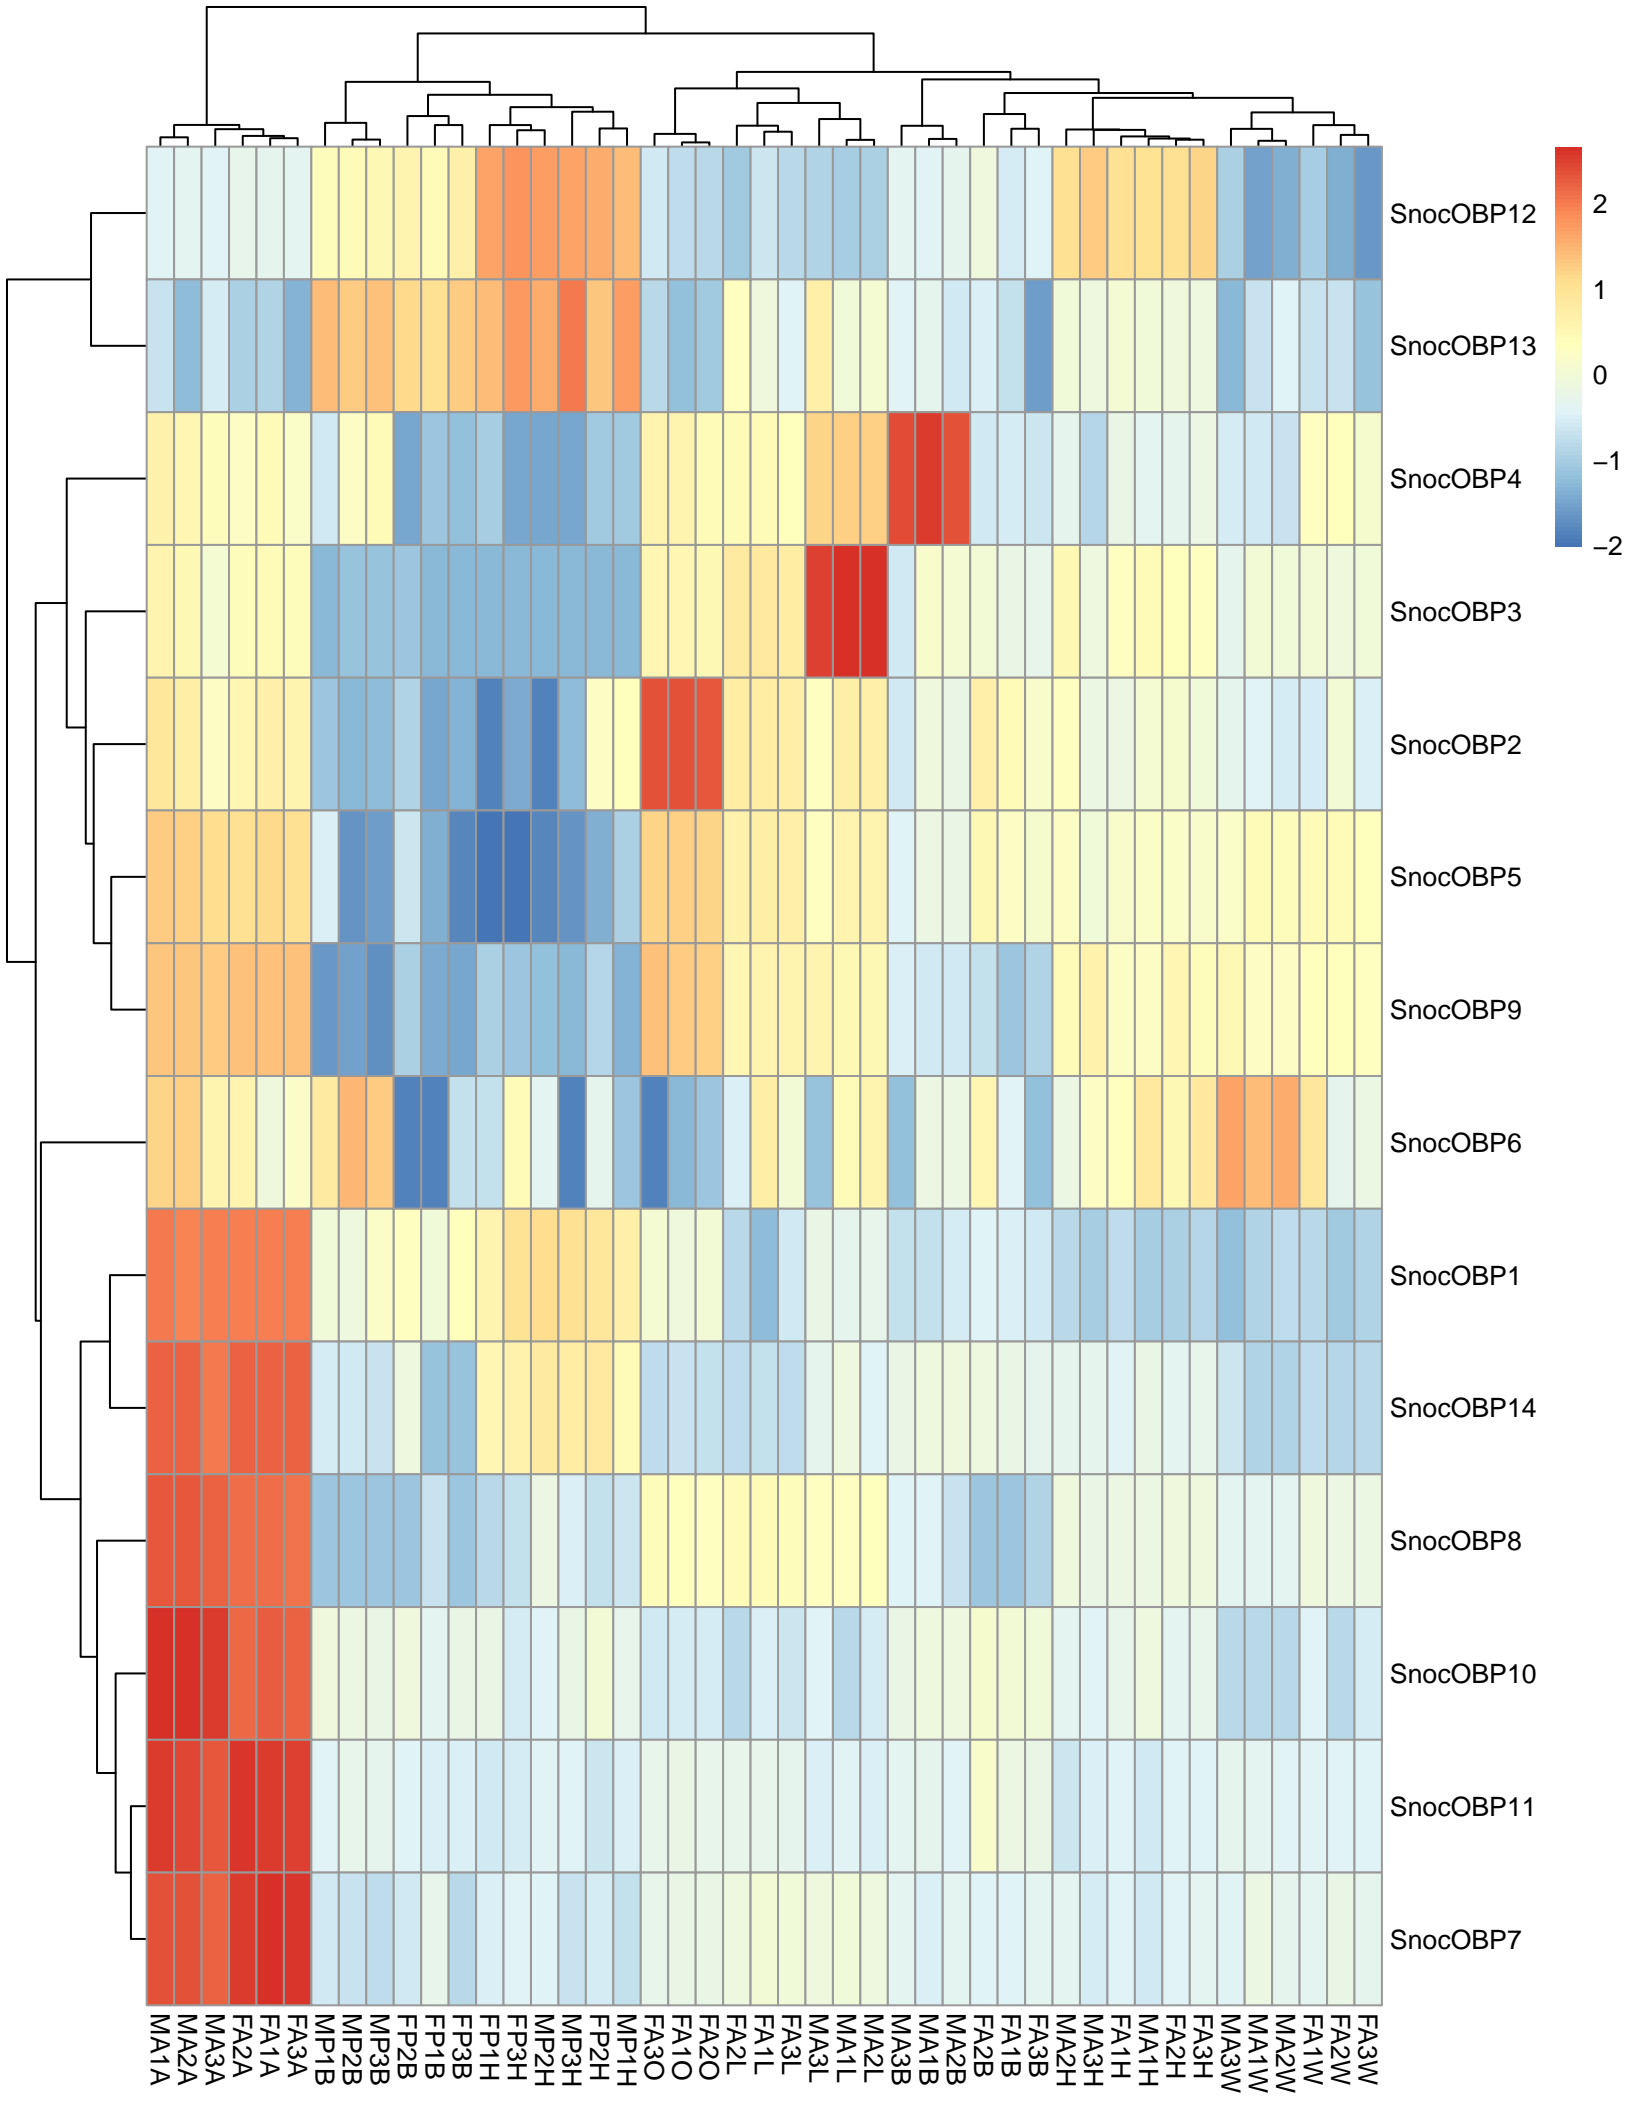

Supplement: Supplementary file 1 [file dada0f7183dab7f3f8a5f661.pdf]
